# Supplementary material
Source: HighWire-hosted journal article supplement (https://bjsm.bmj.com/content/suppl/2005/08/15/38.6.666)
Supplement: 386666editorial.pdf [file 386666editorial.pdf]

# Redactioneel commentaar

Het artikel 'Waarom we prestatieverbeterende middelen in sport zouden moeten toestaan' van Savulescu e.a. start met de stelling dat 'het legaliseren van drugs in sport mogelijk eerlijker en veiliger is.'

Het gebruik van medicamenten in de sport wordt door velen gezien als een manier om prestaties te verbeteren. Rondom het gebruik van medicamenten in de topsport bestaan vele anekdotes die tot waarheid worden verheven.

Jaren geleden werd ik geconfronteerd met de vraag of het gebruik van EPO (erythropoëetine) bij wielrenners zou kunnen leiden tot een CVA (cerebrovasculair accident). Op puur theoretische gronden heb ik de betrokken collega proberen uit te leggen dat met een hogere haematocriet en dus hogere viscositeit van het bloed een grotere kans zou kunnen bestaan op trombusvorming (bloedstolsels). Naar aanleiding van deze moeilijk te beantwoorden vraag ben ik te rade gegaan bij collega's die meer ervaren zijn op het gebied van begeleiding van topsporters. Daar het een intrigerend onderwerp betrof volgde er een belronde langs meerdere collega's.

Enkele dagen later werd ik verrast door een paginagroot artikel in een Nederlandse kwaliteitskrant, waarin een van de geconsulteerde mensen melding maakte van het overlijden van een wielrenner ten gevolge van een CVA door EPO-gebruik. In het onderhavige geval echter bleek uit obductie dat het hier een structurele hartafwijking betrof. Deze ervaring heeft mij geleerd voorzichtig te zijn met al te veel commentaar op dopinggebruik, omdat maar weinig feiten bekend zijn.

Vanuit klinisch oogpunt wil ik wel de argumentatie van Savulescu e.a. belichten.

Waarom gebruiken atleten doping? Verbazingwekkend genoeg, gebeurt het in de meeste gevallen niet voor de roem of om het geld. Sommigen gebruiken doping om te winnen, maar de meerderheid gebruikt het om te overleven in de sport. "The moment you dope you become ten times more professional," verklaarde David Millar, nadat hij was betrapt. "You say, this is no longer sport, this is my job." Pantani heeft tijdens zijn actieve wielercarrière een enorme druk ervaren om te presteren, waardoor hij uiteindelijk, na een vlucht, tragisch aan zijn eind kwam.

Verliezers in dit spel zijn degenen die de eerste plek niet kunnen bemachtigen ten koste van een valsspeler en degenen die onherstelbare schade oplopen door het niet geïndiceerd gebruik van medicatie. Een voorbeeld uit de eerste categorie is Michael Rodgers, die vierde werd in de Olympische tijdrit waar winnaar Tyler Hamilton later betrapt werd op bloeddoping; dezelfde Rodgers werd twee jaar daarvoor tweede op het wereldkampioenschap tijdrijden achter David Millar. In de wielersport is Mauro Gianetti een voorbeeld

uit de tweede categorie door gebruik van PFC (perfluorocarbon), een kunstmatige zuurstofcarrier. Het gebruik van zuurstofcarriers als geneesmiddel en vervanging voor bloed is namelijk nog steeds onderwerp van wetenschappelijk onderzoek. Bijwerkingen van PFC's zijn koorts, trombopenie (verlaagd aantal bloedplaatjes), ernstige leverfunctiestoornissen en leukocytose (toegenomen aantal witte bloedcellen).

De farmaceutische en biotech-industrie ontdekken nieuwe wegen om ziektes te kunnen behandelen. Atleten en hun wetenschappelijke staf zijn bereid om met deze nieuwe middelen te experimenteren en ontdekken manieren om gebruik van deze middelen te maskeren.

De in mijn ogen scrupuleuze wetenschappers maken gebruik van de nieuwste inzichten op farmacologisch en genetisch gebied om prestatieverhogende preparaten bij atleten te kunnen toepassen. Soms handelt het hier om middelen die nog in het prilste stadium van klinisch onderzoek verkeren (Fase II onderzoek). Een voorbeeld hiervan is Angiogenix (VEGF). Dit is een nicotine-achtige stof die de vorming van bloedvaten bevordert en mogelijk ook invloed heeft op de toename van spiermassa.

De wetenschap ontwikkelt nieuwe toedieningsmethoden van medicijnen, zoals gels en pleisters, waardoor de bloedspiegel gelijkmatiger blijft en de drug moeilijker te detecteren is.

Genetische manipulatie is bij proefdieren reeds toepast, waarbij een toename van de spierkracht kon worden bewerkstelligd tot wel 27 %. Recent is er een proteïne transcriptiefactor ontdekt die het mogelijk maakt fast twitch spiervezels (met als kenmerk spierkracht) te converteren tot slow twitch spiervezels (duurvermogen).

Theodore Friedmann, directeur van het 'Program in Human gene therapy' van de University of California in San Diego, beweert dat 'genetransfer' de mogelijkheid biedt de spiermassa en het erythrocyten-aantal te vergroten. "De genen zijn allemaal bekend en te reproduceren. Met drie á vier postdocs en 1 tot 2 miljoen dollar is alles mogelijk".

Tot slot kan geconcludeerd worden dat er, door grote financiële verschillen, in de sport altijd mogelijkheden blijven voor doping of vals spelen.

Het lijkt een illusie dat de slag in dopingbestrijding kan worden gewonnen. Vanuit het oogpunt van gezondheid is elke sporter die wij kunnen behoeden voor de ernstige gevolgen van onterecht gebruik van geneesmiddelen of genetische manipulatie pure winst.

## OVER DE AUTEUR

Dr. Jeff Senden is als (sport-)cardioloog werkzaam in het Meander Medisch Centrum te Amersfoort. Hij is sinds 1988 betrokken als cardioloog-consulent bij een professionele wielploeg.
